# Supplementary material
Source: publisher site journal article supplement (https://www.dovepress.com/article/331573)
Supplement: Supplementary file 1 [file get_supplementary_file.php]

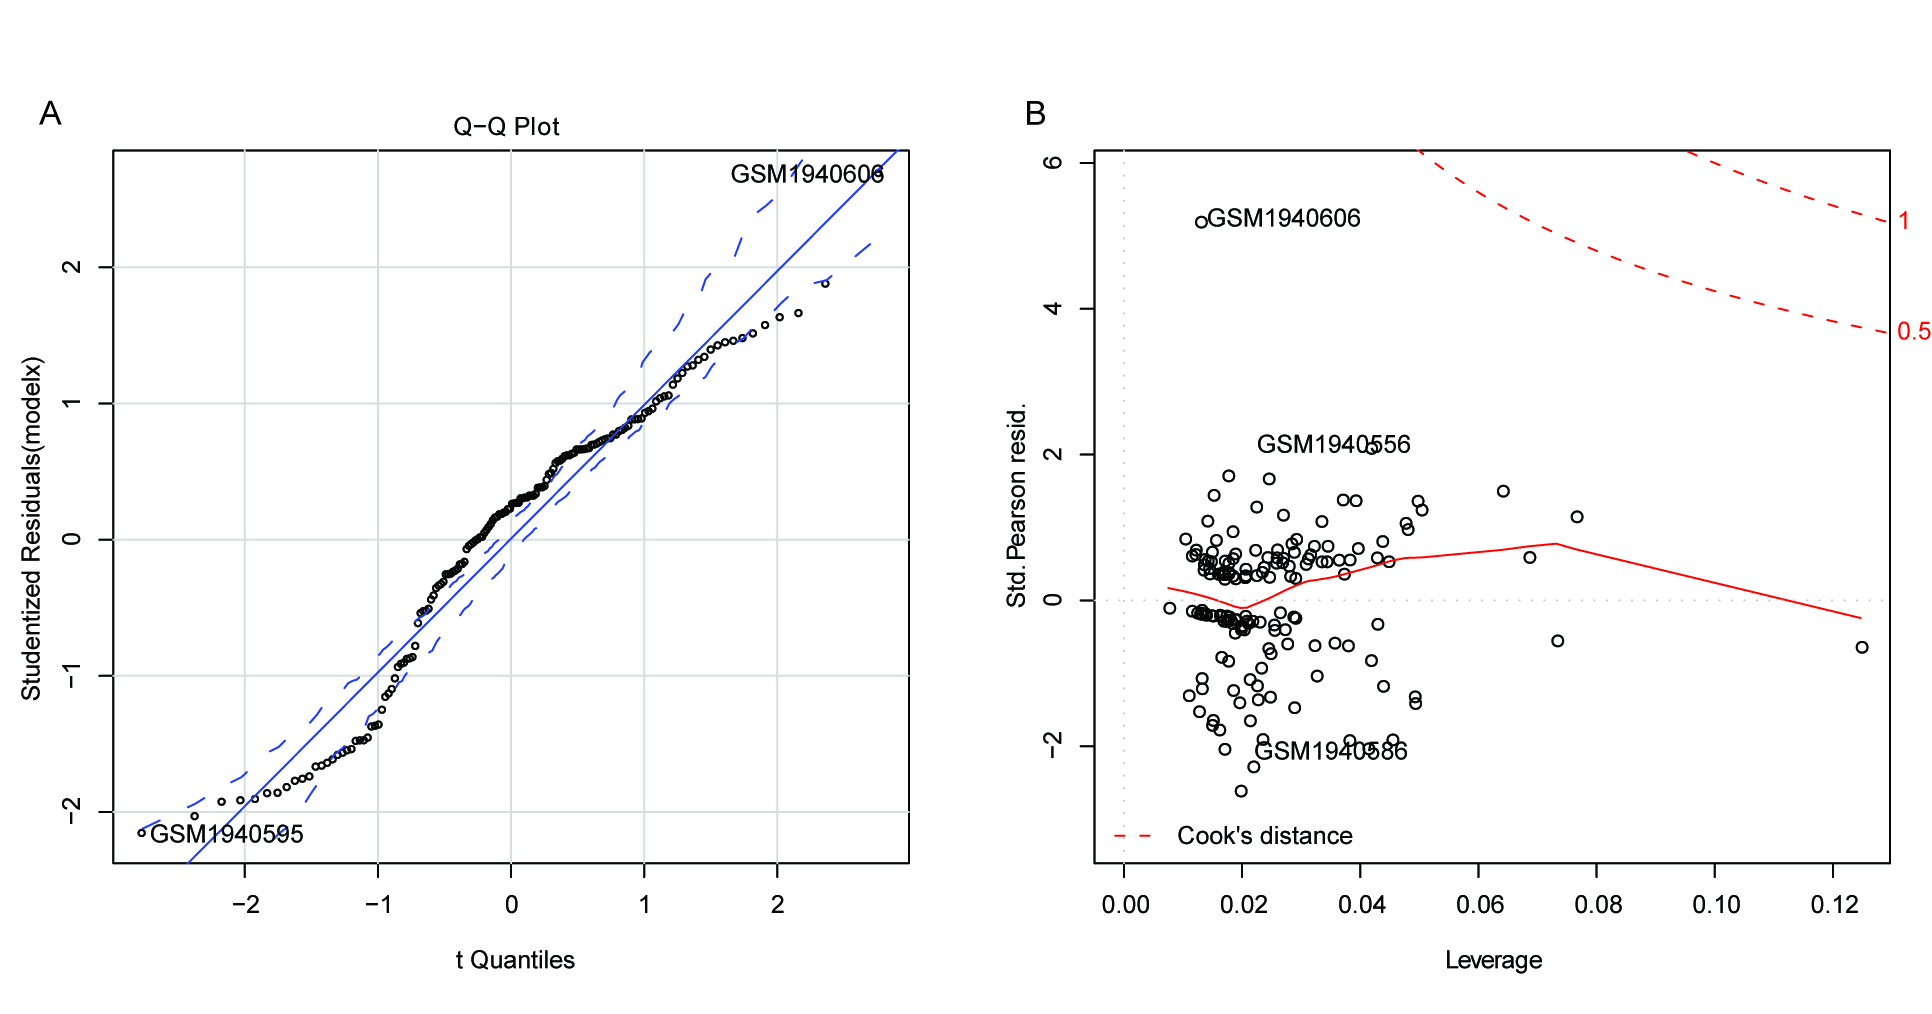


**Fig. S1: The** **parameter of logistic regression model.** (A) The normal Q-Q diagram of the model. The points on the graph should fall on a line at an angle of 45 degree. If the deviation is too large, and the model violates the normal assumption. (B) The residuals vs. leverage diagram of the model. The red dotted line indicates the COOK distance. Generally, a point whose COOK distance greater than 0.5 is a very influential point, and may affect the reliability of the model.

**Table. S1** The full list of significantly enriched GO terms and KEGG pathways.

|  | ONTOLOGY | ID | Description | GeneRatio | BgRatio | p.adjust | geneID | Count |
| --- | --- | --- | --- | --- | --- | --- | --- | --- |
| GO:0032276 | BP | GO:0032276 | regulation of gonadotropin secretion | 5/83 | 11/17653 | 1.83E-06 | LEP/INHA/INHBA/OPRK1/CRH | 5 |
| GO:0032274 | BP | GO:0032274 | gonadotropin secretion | 5/83 | 15/17653 | 5.87E-06 | LEP/INHA/INHBA/OPRK1/CRH | 5 |
| GO:0044060 | BP | GO:0044060 | regulation of endocrine process | 6/83 | 44/17653 | 3.66E-05 | LEP/INHA/INHBA/HCAR2/OPRK1/CRH | 6 |
| GO:0060986 | BP | GO:0060986 | endocrine hormone secretion | 6/83 | 47/17653 | 4.13E-05 | LEP/INHA/INHBA/HCAR2/OPRK1/CRH | 6 |
| GO:0050886 | BP | GO:0050886 | endocrine process | 6/83 | 83/17653 | 0.001015162 | LEP/INHA/INHBA/HCAR2/OPRK1/CRH | 6 |
| GO:0090092 | BP | GO:0090092 | regulation of transmembrane receptor protein serine/threonine kinase signaling pathway | 8/83 | 225/17653 | 0.002766885 | FSTL3/HTRA4/NPNT/INHA/INHBA/ENG/NOG/HTRA1 | 8 |
| GO:0046888 | BP | GO:0046888 | negative regulation of hormone secretion | 5/83 | 63/17653 | 0.002766885 | LEP/INHA/INHBA/OPRK1/CRH | 5 |
| GO:0032275 | BP | GO:0032275 | luteinizing hormone secretion | 3/83 | 10/17653 | 0.002766885 | LEP/OPRK1/CRH | 3 |
| GO:0042698 | BP | GO:0042698 | ovulation cycle | 5/83 | 64/17653 | 0.002766885 | LEP/INHBA/NRIP1/OPRK1/GABRB1 | 5 |
| GO:0048511 | BP | GO:0048511 | rhythmic process | 8/83 | 276/17653 | 0.009214956 | LEP/BHLHE40/INHBA/NTRK2/NRIP1/OPRK1/CRH/GABRB1 | 8 |
| GO:0051048 | BP | GO:0051048 | negative regulation of secretion | 7/83 | 208/17653 | 0.010064231 | LEP/INHA/INHBA/SPX/OPRK1/CRH/IL1R2 | 7 |
| GO:0018126 | BP | GO:0018126 | protein hydroxylation | 3/83 | 23/17653 | 0.025318053 | P4HA1/PLOD2/EGLN3 | 3 |
| GO:0007178 | BP | GO:0007178 | transmembrane receptor protein serine/threonine kinase signaling pathway | 8/83 | 336/17653 | 0.025318053 | FSTL3/HTRA4/NPNT/INHA/INHBA/ENG/NOG/HTRA1 | 8 |
| GO:0030728 | BP | GO:0030728 | ovulation | 3/83 | 24/17653 | 0.025318053 | LEP/INHBA/NRIP1 | 3 |
| GO:0060393 | BP | GO:0060393 | regulation of pathway-restricted SMAD protein phosphorylation | 4/83 | 61/17653 | 0.025318053 | INHA/INHBA/ENG/NOG | 4 |
| GO:0061037 | BP | GO:0061037 | negative regulation of cartilage development | 3/83 | 25/17653 | 0.025318053 | LEP/NOG/FRZB | 3 |
| GO:1903531 | BP | GO:1903531 | negative regulation of secretion by cell | 6/83 | 183/17653 | 0.025318053 | LEP/INHA/INHBA/OPRK1/CRH/IL1R2 | 6 |
| GO:0060389 | BP | GO:0060389 | pathway-restricted SMAD protein phosphorylation | 4/83 | 64/17653 | 0.025318053 | INHA/INHBA/ENG/NOG | 4 |
| GO:1900745 | BP | GO:1900745 | positive regulation of p38MAPK cascade | 3/83 | 26/17653 | 0.025318053 | SASH1/LEP/OPRK1 | 3 |
| GO:0006575 | BP | GO:0006575 | cellular modified amino acid metabolic process | 6/83 | 188/17653 | 0.02571072 | P4HA1/DIO2/PLOD2/EGLN3/GSTA3/VNN3 | 6 |
| GO:0090287 | BP | GO:0090287 | regulation of cellular response to growth factor stimulus | 7/83 | 272/17653 | 0.027761984 | FLT1/FSTL3/HTRA4/NPNT/ENG/NOG/HTRA1 | 7 |
| GO:0046887 | BP | GO:0046887 | positive regulation of hormone secretion | 5/83 | 126/17653 | 0.028878817 | LEP/INHA/INHBA/HCAR2/CRH | 5 |
| GO:0010876 | BP | GO:0010876 | lipid localization | 8/83 | 377/17653 | 0.033738152 | LEP/INHBA/SLCO2A1/HILPDA/NRIP1/ABCG2/SPX/CRH | 8 |
| GO:0050869 | BP | GO:0050869 | negative regulation of B cell activation | 3/83 | 31/17653 | 0.033738152 | INHA/INHBA/BCL6 | 3 |
| GO:0007586 | BP | GO:0007586 | digestion | 5/83 | 134/17653 | 0.033738152 | LEP/SERPINA3/GUCA2A/OPRK1/CRH | 5 |
| GO:0048545 | BP | GO:0048545 | response to steroid hormone | 8/83 | 391/17653 | 0.038367123 | ENG/NRIP1/CATSPERB/CRH/CLDN1/GABRB1/DEFA1B/CPS1 | 8 |
| GO:0005179 | MF | GO:0005179 | hormone activity | 7/80 | 121/17548 | 0.000286393 | LEP/INHA/INHBA/GUCA2A/SPX/CRH/PRL | 7 |
| GO:0019838 | MF | GO:0019838 | growth factor binding | 7/80 | 133/17548 | 0.000286393 | FLT1/HTRA4/ENG/NTRK2/HTRA1/IL1R2/IGFBP1 | 7 |
| GO:0048029 | MF | GO:0048029 | monosaccharide binding | 5/80 | 69/17548 | 0.001205428 | P4HA1/ENG/HK2/PLOD2/EGLN3 | 5 |
| GO:0016706 | MF | GO:0016706 | oxidoreductase activity, acting on paired donors, with incorporation or reduction of molecular oxygen, 2-oxoglutarate as one donor, and incorporation of one atom each of oxygen into both donors | 4/80 | 45/17548 | 0.003015196 | P4HA1/TET3/PLOD2/EGLN3 | 4 |
| GO:0031418 | MF | GO:0031418 | L-ascorbic acid binding | 3/80 | 20/17548 | 0.004583387 | P4HA1/PLOD2/EGLN3 | 3 |
| GO:0030246 | MF | GO:0030246 | carbohydrate binding | 7/80 | 266/17548 | 0.006896736 | P4HA1/SIGLEC6/ENG/HK2/PLOD2/EGLN3/STBD1 | 7 |
| GO:0031406 | MF | GO:0031406 | carboxylic acid binding | 6/80 | 189/17548 | 0.006896736 | P4HA1/PLOD2/EGLN3/FABP4/HAPLN1/CPS1 | 6 |
| GO:0043177 | MF | GO:0043177 | organic acid binding | 6/80 | 191/17548 | 0.006896736 | P4HA1/PLOD2/EGLN3/FABP4/HAPLN1/CPS1 | 6 |
| GO:0005520 | MF | GO:0005520 | insulin-like growth factor binding | 3/80 | 29/17548 | 0.0079239 | HTRA4/HTRA1/IGFBP1 | 3 |
| GO:0051213 | MF | GO:0051213 | dioxygenase activity | 4/80 | 91/17548 | 0.018460585 | P4HA1/TET3/PLOD2/EGLN3 | 4 |
| GO:0048185 | MF | GO:0048185 | activin binding | 2/80 | 12/17548 | 0.027773981 | FSTL3/ENG | 2 |
| GO:0005160 | MF | GO:0005160 | transforming growth factor beta receptor binding | 3/80 | 49/17548 | 0.027773981 | INHA/INHBA/ENG | 3 |
| GO:0031543 | MF | GO:0031543 | peptidyl-proline dioxygenase activity | 2/80 | 13/17548 | 0.027773981 | P4HA1/EGLN3 | 2 |

**Table. S2** The full list of screened top 20 genes.

| Rank | Name | Score |
| --- | --- | --- |
| 1 | LEP | 11 |
| 2 | P4HA1 | 9 |
| 3 | PRL | 8 |
| 4 | ANKRD37 | 6 |
| 4 | FSTL3 | 6 |
| 4 | CRH | 6 |
| 7 | ENG | 5 |
| 7 | COL17A1 | 5 |
| 9 | ABCG2 | 4 |
| 9 | EGLN3 | 4 |
| 9 | IGFBP1 | 4 |
| 9 | CP | 4 |
| 9 | OPRK1 | 4 |
| 9 | FABP4 | 4 |
| 9 | SPAG4 | 4 |
| 16 | S100A12 | 3 |
| 16 | SIGLEC6 | 3 |
| 16 | TREM1 | 3 |
| 16 | INHBA | 3 |
| 16 | HCAR3 | 3 |
